# The FELIX Project: Deep Networks To Detect Pancreatic Neoplasms

Yingda Xia<sup>1,†</sup>, Qihang Yu<sup>1,†</sup>, Linda Chu<sup>2,†</sup>, Satomi Kawamoto<sup>2,†</sup>, Seyoun Park<sup>2</sup>, Fengze Liu<sup>1</sup>, Jieneng Chen<sup>1</sup>, Zhuotun Zhu<sup>1</sup>, Bowen Li<sup>1</sup>, Zongwei Zhou<sup>1</sup>, Yongyi Lu<sup>1</sup>, Yan Wang<sup>1</sup>, Wei Shen<sup>1</sup>, Lingxi Xie<sup>1</sup>, Yuyin Zhou<sup>1</sup>, Christopher Wolfgang<sup>3</sup>, Ammar Javed<sup>3</sup>, Daniel Fadaei Fouladi<sup>2</sup>, Shahab Shayesteh<sup>2</sup>, Jefferson Graves<sup>2</sup>, Alejandra Blanco<sup>2</sup>, Eva S. Zinreich<sup>2</sup>, Benedict Kinny-Köster<sup>3</sup>, Kenneth Kinzler<sup>4,6,7,8</sup>, Ralph H. Hruban<sup>5</sup>, Bert Vogelstein<sup>4,6,7,8,9</sup>, Alan L. Yuille<sup>1,\*</sup>, Elliot K. Fishman<sup>2,\*</sup>

**\*For correspondence:**

[ayuille1@jhu.edu](mailto:ayuille1@jhu.edu) (ALY);  
[efishman@jhmi.edu](mailto:efishman@jhmi.edu) (EKF)

<sup>†</sup>These authors contributed equally to this work

<sup>1</sup>Department of Computer Science, Johns Hopkins University; <sup>2</sup>Department of Radiology and Radiological Science, Johns Hopkins Medicine; <sup>3</sup>Department of Surgery, New York University; <sup>4</sup>Department of Oncology, Johns Hopkins Medicine; <sup>5</sup>Department of Pathology, Johns Hopkins Medicine; <sup>6</sup>Ludwig Center, Johns Hopkins University School of Medicine; <sup>7</sup>Sidney Kimmel Comprehensive Cancer Center, Johns Hopkins University School of Medicine; <sup>8</sup>Sol Goldman Pancreatic Cancer Research Center, Johns Hopkins University School of Medicine; <sup>9</sup>Howard Hughes Medical Institute, Johns Hopkins Medical Institutions

---

**Abstract** Tens of millions of abdominal images are performed with computed tomography (CT) in the U.S. each year but pancreatic cancers are sometimes not initially detected in these images. We here describe a suite of algorithms (named FELIX) that can recognize pancreatic lesions from CT images without human input. Using FELIX, >90% of patients with pancreatic ductal adenocarcinomas were detected at a specificity of >90% in patients without pancreatic disease. FELIX may be able to assist radiologists in identifying pancreatic cancers earlier, when surgery and other treatments offer more hope for long-term survival.

---

## Introduction

Pancreatic ductal adenocarcinomas (PDAC) are among the deadliest of all malignancies. They typically appear as solid hypo-enhancing mass lesions on CT scans. Over 40 million abdominal CT scans are performed in the US each year, providing an opportunity for the earlier detection of pancreatic cancer. Most such CT scans are taken for reasons unrelated to suspected pancreatic neoplasia. Retrospective reviews of CT scans demonstrate that early PDACs are missed in a substantial number of scans performed before patients become symptomatic (*Chu et al., 2017; Gonoj et al., 2017*).

Recent improvements in the power of Artificial Intelligence (AI) to identify objects in images suggest that AI might be able to assist radiologists in a variety of ways. Deep networks (*LeCun et al., 2015*) are the most natural form of AI for detecting and localizing cancerous tumors. They have already been applied to many types of radiographic images, including those of the pancreas (reviewed in Appendix 1). But the detection of pancreatic neoplasms is especially challenging, in part because the shape of the normal pancreas is more variable than the shape of many other organs and the pancreas can move unpredictably within the abdominal cavity during the imaging process, unlike other organs such as the brain.

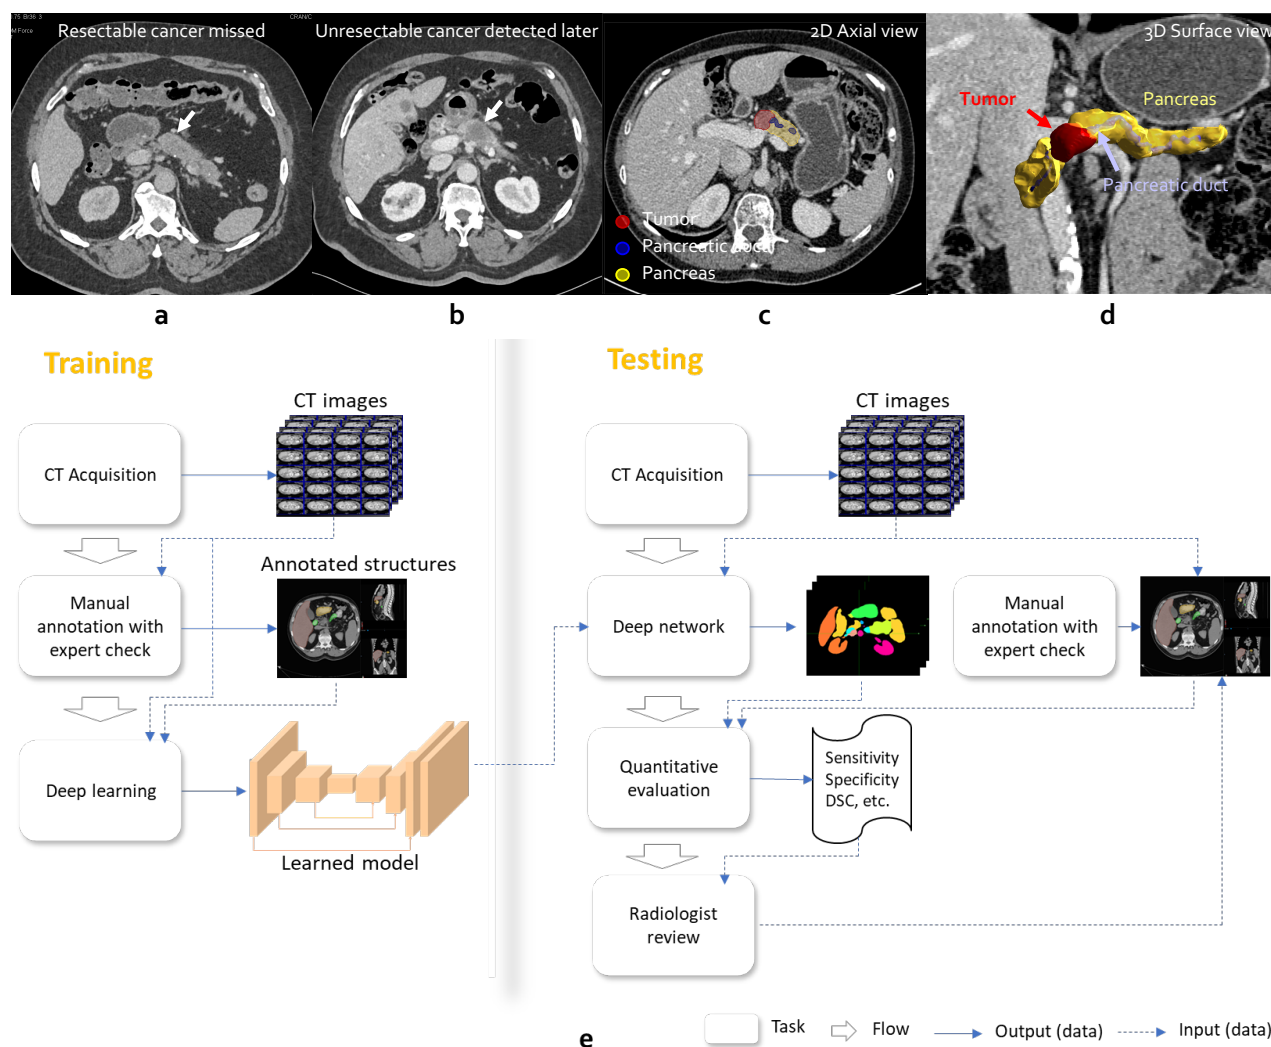

**Figure 1.** a,b: Early signs of pancreatic cancer are subtle (see arrow) and it is easy to miss a resectable (i.e., treatable) cancer. c,d: the pancreas is annotated in yellow, the PDAC tumor in red, and the pancreatic duct in blue. e: the workflow of FELIX.

42 We here describe a suite of algorithms that have been specifically created for the purpose of  
 43 detecting pancreatic cancers using deep networks. This project was commissioned by the Lustgarten  
 44 Foundation for Pancreatic Cancer Research five years ago, and was named FELIX.

## 45 Results

### 46 Task I: Recognizing the normal pancreas and neighboring abdominal organs

47 The first step in developing algorithms that could recognize a pancreatic cancer is to train algo-  
 48 rithms that recognize the normal pancreas. For this purpose, we assembled a set of 836 abdominal  
 49 CT images from healthy individuals at Johns Hopkins Hospital. For each patient, there was one ve-  
 50 nous and one arterial set of images, for a total of 1,672 CT scans, each containing from 319 to 1,051  
 51 CT slices. Each set of images was manually annotated by an expert, with outlines of the pancreas  
 52 drawn in all three spatial dimensions, as described in the Materials & Methods. In addition to the  
 53 pancreas, the annotation included that of 19 neighboring abdominal organ structures because we  
 54 initially expected that these other organs might subsequently be useful for distinguishing lesions  
 55 within the pancreas from those of neighboring organs. It required an average of 3 hours to manu-  
 56 ally annotate the images of one healthy individual. This curated dataset of abdominal CT images

57 from healthy individuals is unprecedented in scale, exceeding the total of all previously published  
58 abdominal CT scans used for designing deep networks (*Luo et al., 2021; Wasserthal et al., 2022;*  
59 *Antonelli et al., 2022; Chen et al., 2022*).

60 To recognize the pancreas and neighboring abdominal organs, we modified 3D U-Net, a basic  
61 symmetric deep network architecture consisting of encoder and decoder sub-networks. The final  
62 algorithm (FELIX 1.0) made for normal pancreas segmentation (i.e., the allocation of pixels within  
63 the image to the pancreas) or for the segmentation of other abdominal organs (e.g., allocating  
64 pixels to the liver or spleen) are detailed in the Materials & Methods. FELIX 1.0 took the arterial and  
65 venous phases as input, aligned them with an auto-alignment algorithm (see Material & Methods),  
66 and then applied the deep network to obtain the segmentation. But it could also be run using  
67 each phase separately. Performance was assessed by training the algorithm on a training set (531  
68 patients) from Cohort 1, and independently validated on a test set of 305 individuals.

69 Previous studies showed that the pancreas is difficult to segment compared to other organs  
70 such as the liver and that its precise boundaries are hard to determine even by an expert radiolo-  
71 gist (*Zhou et al., 2017; Zhu et al., 2018; Yu et al., 2018; Wang et al., 2019; Fu et al., 2020; Isensee*  
72 *et al., 2021*). The FELIX 1.0 algorithm was able to “find” and segment the pancreas in 100% of the  
73 305 individuals in the test set. However, this 100% figure is only meaningful if the size and shape  
74 of the predicted pancreas matches that of the “ground truth”, i.e., the pancreas size and shape  
75 determined by an expert radiologist. The reliability of segmentation algorithms is often evaluated  
76 by DSC (Dice Similarity Coefficients), which are indices of spatial overlap. DSC can range from 0,  
77 indicating no spatial overlap between the ground truth and the AI prediction, to 1, indicating com-  
78 plete overlap. The DSC obtained by FELIX 1.0 averaged 87% (IQR 85% to 91%) and the DSC for the  
79 venous or arterial phases alone averaged 86% (IQR 83% to 91%) on the test set. The DSCs were  
80 also high on most of the 19 neighboring abdominal organs, with a liver DSC of 97% and spleen of  
81 96%. Examples of the original CT images, the manually annotated images, and the FELIX-predicted  
82 images are shown in Figure 1.

### 83 **Task II: Recognizing a PDAC within the pancreas**

84 For this task, we assembled a set of CT images from 426 patients with PDAC from Johns Hopkins  
85 Hospital (Cohort 2, Table 1). We assessed only patients in whom the excised PDAC was confirmed  
86 through evaluation by an expert pathologist. As with the healthy individuals from Cohort 1, there  
87 was one venous and one arterial set of images from each patient in Cohort 2, for a total of 852  
88 CT scans, and each set of images was manually annotated by an expert team (Materials & Meth-  
89 ods). This curated dataset of abdominal images from patients with PDAC, like the set from healthy  
90 individuals, is unprecedented in scale (*Antonelli et al., 2022*).

91 The AI algorithms developed for Task II were trained to predict which voxels in the images rep-  
92 resented healthy pancreatic tissue and which represented PDAC. This task required an additional  
93 suite of algorithms, in aggregate called FELIX 1.1. A U-Net architecture was used to incorporate a  
94 “bounding box” into FELIX 1.0 that surrounded the pancreas and aligned the venous and arterial  
95 phases. Using the two aligned scans as input, FELIX 1.1 then segmented all the voxels within the  
96 bounding box as either normal or abnormal voxels. These and other components of FELIX 1.1 are  
97 detailed in the Materials & Methods.

98 FELIX 1.1 was trained on 1,592 patients from JHH, and then independent validated on images  
99 from 213 other patients. Examples of the original CT images, the manually annotated images, and  
100 the FELIX-predicted images are shown in Figure 2. Box plots of DSC and ASSD scores to judge per-  
101 formance in the independent validation set of 213 patients are shown in Figure 5a and Figure 10a,  
102 respectively. The predictions had a sensitivity for detecting pancreatic cancers of 97% at a speci-  
103 ficity of 99% (Figure 4a). The performance of the venous or arterial phases alone (sensitivity and  
104 specificity of 93% and 99%) was less than the performance of the dual-phase images. This high-  
105 lighted the importance of the auto-alignment and other modules of the algorithms in FELIX 1.1 that  
106 were able to combine the arterial and venous phase images into a single, more informative set of

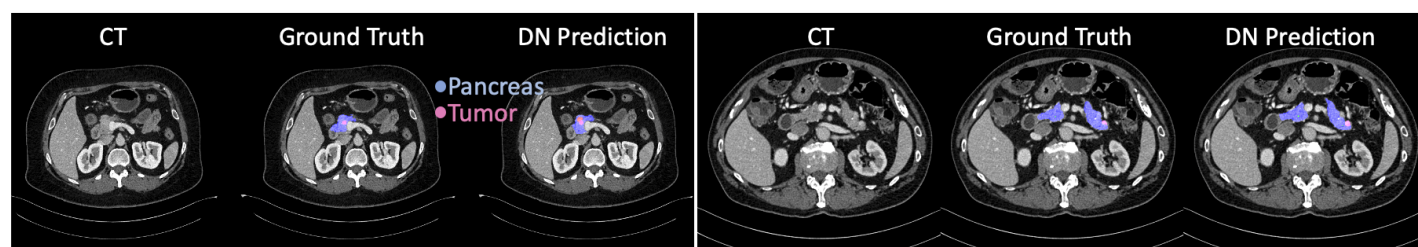

**Figure 2.** Visualization of CT scans inputs, ground-truths and our predictions.

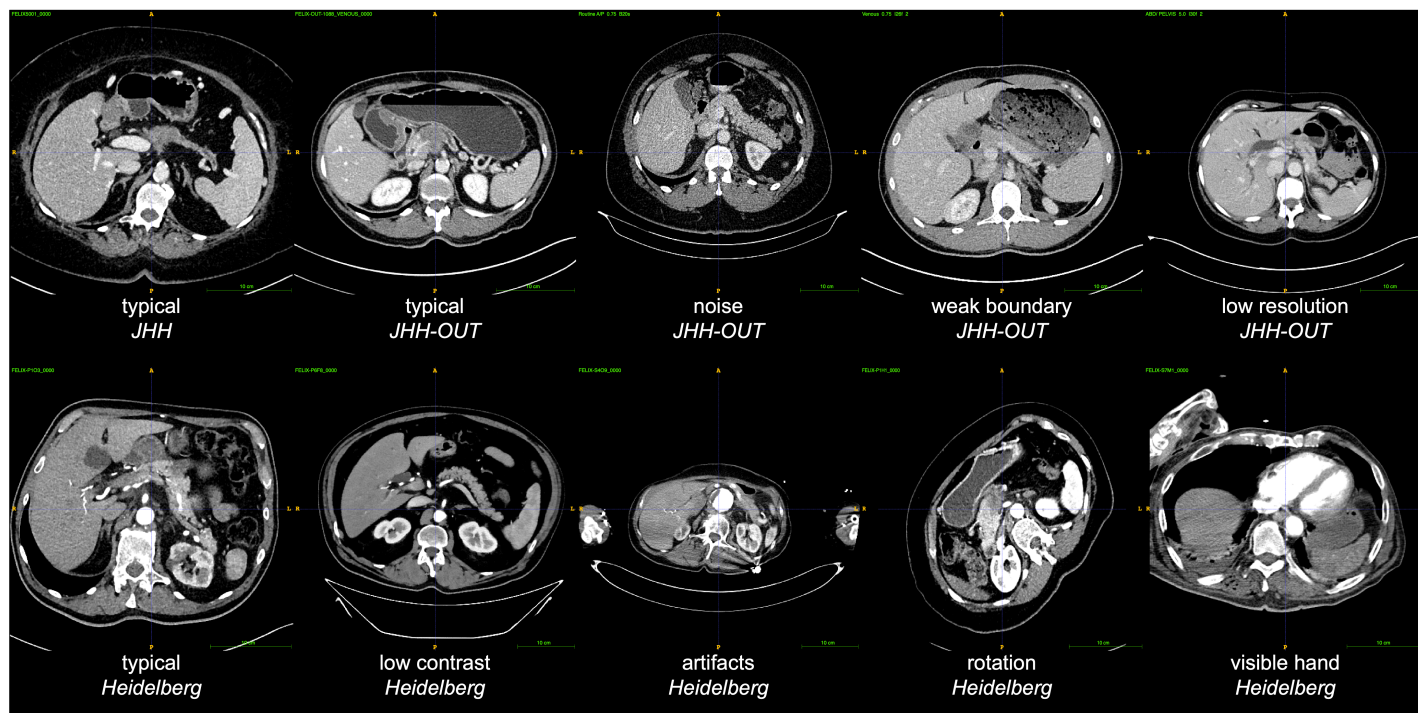

**Figure 3.** Examples of CT scans from different hospitals (domains) illustrating the variability in the CT scans caused by different scanners and protocols. In the FELIX project we trained the AI algorithms on the JHH data only and tested them on JHH data and on CT scans from other datasets, including multi-center, multi-phase, and multi-vendor cases.

107 images.

108 The 97% sensitivity for detecting a PDAC within the pancreas does not fully illustrate the perfor-  
109 mance of FELIX. We defined a true positive not only as a PDAC that was predicted to exist within  
110 the pancreas, but was also localized correctly. This is quite different from what can be achieved  
111 with radiomics techniques, for example, which predict the existence of a lesion but not its loca-  
112 tion (*Mukherjee et al., 2022*). In Cohort 2, the average DSC obtained by FELIX 1.0 was 65% (IQR  
113 58% to 85%) and the DSC for the venous or arterial phases alone averaged 63% (IQR 49% to 82%),  
114 meaning that that at least half of the pixels predicted to be PDAC were actually PDAC.

### 115 **Task III: Recognizing PDAC in CT images from other institutions**

116 The patients in Cohorts 1-2 were universally imaged using radiologic protocols at the Johns Hop-  
117 kins Hospital on Siemens' CT instruments. But there are well-documented cases where AI algo-  
118 rithms perform extremely well on datasets similar to those on which they were trained, but fail  
119 when tested on datasets from other institutions or under different conditions (*Perone et al., 2019*;  
120 *Zhang et al., 2020b*; *Pooch et al., 2020*). In the AI community, this is known as the domain trans-  
121 fer problem (*Yuille and Liu, 2021*). This problem is particularly challenging for the detection of



122 PDACs because there are so many variables that could impact performance (see examples in Fig-  
123 ure 3). These variables include the type and manufacturer of the CT scanner, the resolution of the  
124 scanner, the CT slice thickness, the nature and timing of the contrast dye injection, the times at  
125 which images were obtained following contrast dye injection, whether single phase (venous only)  
126 or 2-phase (arterial and venous) images are taken, whether oral contrast as well as intravenous  
127 contrast dyes are administered, whether patients have fasted before imaging and the duration of  
128 such fasting, and the angle of the scanner with respect to the patient's coronal axis (sometimes  
129 this axis is tilted to highlight certain abdominal organs). It would be nearly impossible to get train-  
130 ing sets that capture the diversity of these variables as well as the heterogeneity inherent in PDAC  
131 characteristics such as size, shape, texture and location within the pancreas.

132 To being to surmount this challenge, we artificially created a much larger training dataset by  
133 applying data augmentation techniques to the JHH training set. For example, we simulated three-  
134 dimensional rotations of the CT scans and adjustments of other scan properties such as CT slice  
135 thickness. The resultant large increase in data enabled us to train a much larger deep network  
136 simply by adding extra components to our original network rather than acquiring a much larger  
137 number of CT scans. The resulting algorithms were in aggregate called FELIX 1.2, elaborated in  
138 Material & Methods.

139 We assessed four other cohorts to assess the performance of FELIX 1.2 in scans from other  
140 institutions. None of the patients in these cohorts were used for training purposes. The CT scans  
141 from Cohort 3 were obtained from 399 patients with PDAC, with images taken in the U.S. but not  
142 at Johns Hopkins Hospital (Table 1). The images were acquired with GE, Siemens, Phillips, and  
143 Toshiba scanners but the slice thicknesses varied widely. Moreover, for most of the scans, only  
144 venous phase images (rather than venous plus arterial phase images) were available, and other  
145 components of the imaging protocol were often different than those performed at Johns Hopkins.  
146 Despite these differences, the sensitivities for detecting PDAC were >97% (Figure 4c). In Cohort 3,  
147 the average DSC for the venous phase was 58% (IQR 41% to 80%), as shown in Figure 5c.

148 The CT scans from Cohort 4 were obtained from 82 healthy individuals without pancreatic dis-  
149 ease, with images taken at the NIH. The images were acquired on Philips as well as Siemens scan-  
150 ners and the slice thicknesses (1.0 to 5.0mm) were considerably larger than those (0.5mm) from  
151 the healthy individuals in Cohort 1. Nevertheless, the DSC for the normal pancreas (83%, IQR 81%  
152 to 86%) were nearly as high as those obtained for the test set in Cohort 1 (87%, IQR 85% to 91%),  
153 as shown in Figure 5c.

154 The CT scans from Cohorts 5-6 were obtained from 164 individuals without pancreatic disease  
155 and 78 with PDAC (Table 1). The vast majority of these were acquired with Siemens scanners. In 77  
156 scans, subjects were rotated along the vertical axis from 30 to 60 degrees (examples in Figure 3).  
157 Sensitivity and specificity were >90%, when either single-phase venous images or dual-phase im-  
158 ages, were available. The DSC for the normal pancreas (84%, IQR 83% to 89%) were nearly as high  
159 as those obtained for the test set in Cohorts 1-2 (Figure 5d).

#### 160 **Task IV: Recognizing other pancreatic tumor types**

161 Though PDACs are the most dangerous form of pancreatic tumors, they comprise only a minority  
162 of those occurring in the pancreas. Other tumor types such as benign tumors with varying ma-  
163 lignant potential, e.g., intraductal papillary mucinous neoplasm (IPMN), are more than ten-fold as  
164 common than PDAC. Malignant neoplasms named Pancreatic Neuroendocrine Tumors (PanNETs)  
165 occur ~five-fold less frequently than PDACs, but can often be cured. Detection of these lesions is  
166 an important component of any approach designed to evaluate abdominal CT scans.

167 Detecting pancreatic cysts and PanNETs raises additional challenges for AI algorithms because  
168 these lesions exhibit a greater variety of texture patterns than PDACs. But we were able to train FE-  
169 LIX to recognize them with only a few modifications to those described above for detecting PDACs  
170 (modified algorithm suite named FELIX 1.3, Material & Methods). One of the most important of  
171 these modifications was multiscale processing, which proved critical for recognizing smaller lesions

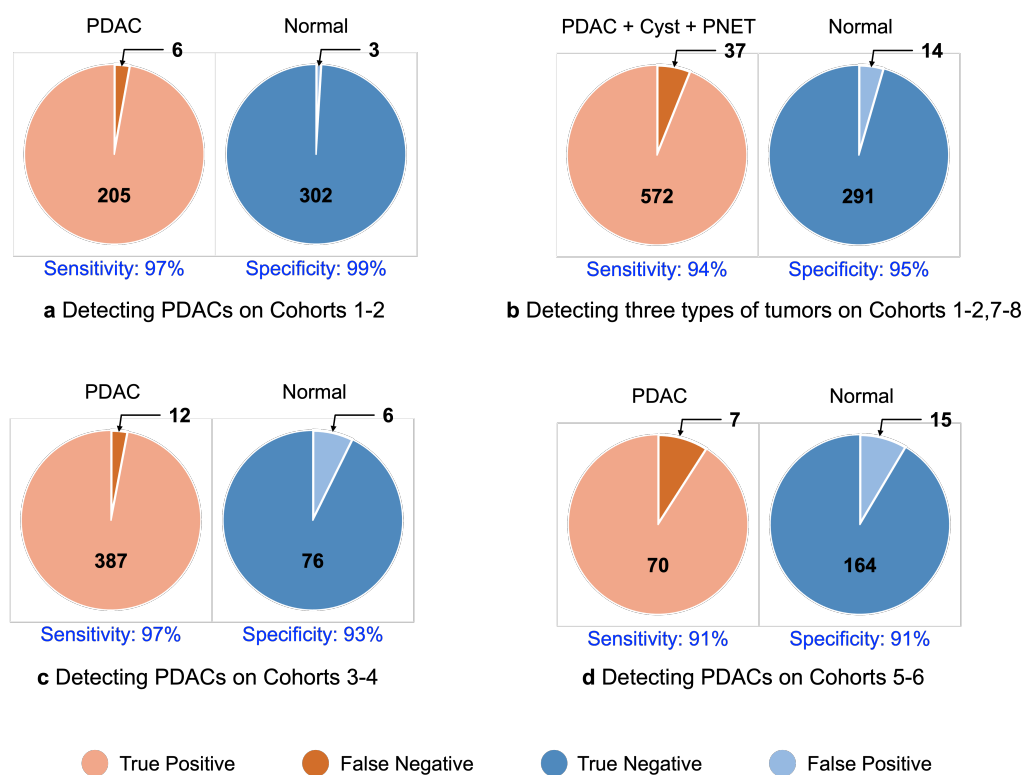

**Figure 4.** A summary of our AI algorithm performing on CT scans from different hospitals. The AI trained on JHH data performed at level close to expert radiologists on JHH test set, but performance declined somewhat on data from other hospitals. The AI algorithms were trained on 1,592 × 2 CT scans from JHH.

172 (see Figure 9).

173 The algorithmic development for FELIX 1.3 was done similarly to that for the other algorithms,  
 174 with training and testing sets kept independent. When tested on healthy individuals in Cohort 1  
 175 and patients with PDACs in Cohort 2, its sensitivity and specificity remained as high as it was with  
 176 FELIX 1.1, as expected. We then assembled a set of CT images from 450 patients with PanNETs and  
 177 458 patients with pancreatic cysts (Cohorts 7 and 8, respectively). The sensitivities for recognizing  
 178 pancreatic cysts and PanNETs were 95% and 94%, respectively. The specificity of detecting three  
 179 types of tumors was 95% (Figure 4b). As with PDAC, we defined a true positive as a lesion within  
 180 the pancreas that was not only detected but correctly localized. The localization of these tumors  
 181 was similar to that obtained with PDAC—a DSC of 57% (IQR 25% to 86%) for PanNETs and 66% (IQR  
 182 52% to 88%) for pancreatic cysts (Figure 5b).

183 The pancreatic cysts within Cohort 8 also provided an opportunity to assess the performance of  
 184 the FELIX algorithms for detecting small lesions. PDACs are generally rather large when diagnosed,  
 185 which is one of the major issues confronting their effective treatment. Because our study was  
 186 retrospective in nature, the vast majority of the PDACs in Cohorts 2, 4, and 5 were larger than  
 187 2cm, though we were able to detect and localize PDACs smaller than 2cm with 77% sensitivity  
 188 at a specificity of 88%. Pancreatic cysts are often detected adventitiously in abdominal CT scans  
 189 carried out for other purposes, and many of them were <2cm in diameter. The sensitivity of FELIX  
 190 for detecting pancreatic cysts <2cm was 76% at a specificity of 88%, with cysts as small as 2mm in  
 191 diameter detectable (Figure 9). A cyst of 2mm in diameter is represented by only 15,000 voxels out  
 192 of the 131,072,000 voxels in a typical CT image.

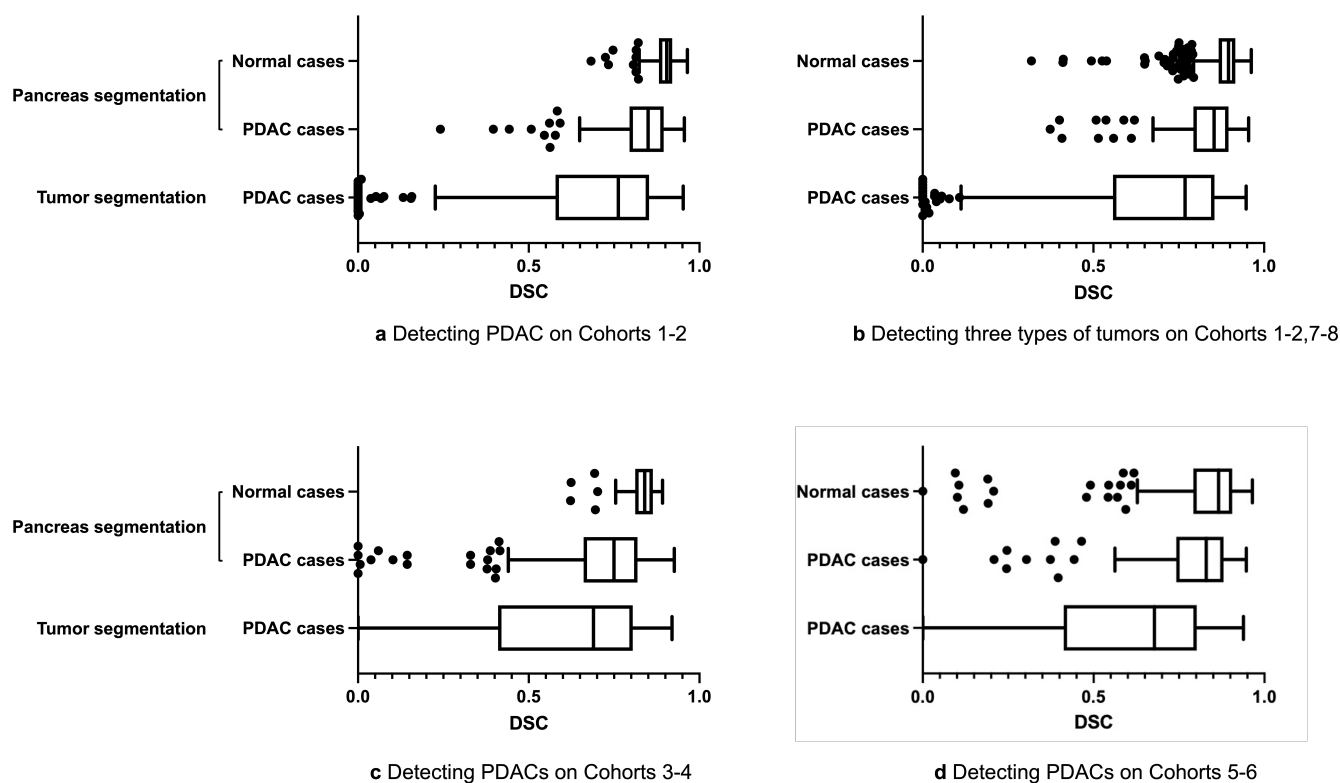

**Figure 5.** Performance of the pancreas segmentation and tumor localization evaluated by Dice-Sorensen similarity coefficient (DSC). Observe that the DSC scores are typically high but with some small outlier cases indicated by the black dots.

## 193 Discussion

194 The results summarized in Figures 4–5 show that pancreatic tumors, and in particular PDAC, can  
195 be detected and localized with FELIX algorithms at sensitivity and specificity >90%. When tested on  
196 Cohorts 1 and 2, from Johns Hopkins Hospital, the sensitivity and specificity were >95%. Algorithms  
197 were able to evaluate CT scans generated through a variety of protocols, with varying resolutions,  
198 slice thicknesses, radiographic protocols, and scanning instruments. The scale of these studies  
199 and the clinical performance of the FELIX algorithms substantially exceed those of previous studies.  
200 We anticipate that better performance can be achieved in future work by training on even larger  
201 datasets and by exploiting technical advances in AI algorithms.

202 But the FELIX study has several limitations. We certainly have not “solved” the domain transfer  
203 problem for pancreatic tumors. Though FELIX performed fairly similarly regardless of the source of  
204 the CT scan and the radiographic procedures used it performed highest on scans from Johns Hop-  
205 kins Hospital. Moreover, there are a large number of variables that can affect this performance that  
206 have not yet been tested. These includes images taken with instruments other than those we have  
207 tested on (predominantly manufactured by Siemens) those taken after oral contrast agents are  
208 administered, and those taken when there are extraneous features, such as clips or stents, within  
209 the patient. These extraneous features are easy to recognize by humans, but not by computers,  
210 unless they are represented in the training set.

211 A second limitation is in the detection of very small tumors. Optimally, an AI-based method  
212 would be able to detect PDACs as small as 5mm in diameter, as the earlier the detection the greater  
213 the chance for effective therapy. Moreover, small tumors are more likely to be missed by practicing  
214 radiologists. But the number of patients with PDACs that are detected when their tumors are <1cm  
215 in diameter is small, even in relatively large pancreatic cancer centers such as at Johns Hopkins  
216 or Heidelberg. It will require a large, multi-institutional collaborative study to acquire a sufficient

217 number of small PDACs to engender cohorts for adequate training and testing of very small PDACs.  
218 Third, though FELIX algorithms can detect pancreatic cysts and PanNETs in addition to PDACs,  
219 there are other pancreatic diseases, such as acute or chronic pancreatitis and metastatic lesions  
220 from other organs to the pancreas, that have not yet been evaluated.

221 Finally, our study was retrospective in nature, with diagnoses all previously made and confirmed  
222 through histopathological analysis. The eventual goal of FELIX is to be able to act as a “second  
223 reader”, providing the radiologist with a simple and instantaneously available tool to call attention  
224 to pancreatic lesions of interest. The next generation of FELIX will develop better AI algorithms,  
225 incorporate both radiologic and clinical features to predict the existence, size, boundaries, and type  
226 of lesion within the pancreas. This will enable the AI algorithms to be tested in a large, prospective  
227 study and to evaluate its clinical utility.

## 228 Materials & Methods

**Table 1.** The statistics of datasets for evaluation. Detailed demographic information can be found in the attached supporting file.

| name     | component               | slice thickness | venous | arterial | source                                  |
|----------|-------------------------|-----------------|--------|----------|-----------------------------------------|
| Cohort 1 | 300 healthy individuals | 0.5mm           | ✓      | ✓        | collected at Johns Hopkins Hospital     |
| Cohort 2 | 213 PDAC patients       | 0.5mm           | ✓      | ✓        | collected at Johns Hopkins Hospital     |
| Cohort 3 | 399 PDAC patients       | [1.0, 5.0]mm    | ✓      |          | collected at hospitals in Johns Hopkins |
| Cohort 4 | 82 healthy individuals  | [1.5, 2.5]mm    | ✓      |          | taken from the NIH Pancreas-CT dataset  |
| Cohort 5 | 164 healthy individuals | [0.64, 2.0]mm   | ✓      | ✓        | collected at Heidelberg Medical School  |
| Cohort 6 | 78 PDAC patients        | [0.64, 2.0]mm   | ✓      | ✓        | collected at Heidelberg Medical School  |
| Cohort 7 | 450 PanNET patients     | 0.5mm           | ✓      | ✓        | collected at Johns Hopkins Hospital     |
| Cohort 8 | 458 Cyst patients       | 0.5mm           | ✓      | ✓        | collected at Johns Hopkins Hospital     |

### 229 Study participants and sampling procedures

230 Table 1 summarizes the datasets used in this study. The distribution of tumor size in each dataset is  
231 presented in Figure 6. The attached supporting file contains the detailed demographic information.

232 *Cohorts 1, 2, 7, and 8* consisted of 2,519 subject cases, containing cases of Normal, PDAC, Cyst,  
233 and PanNET, respectively. Each subject had two intravenous contrast CT scans in both venous  
234 and arterial phases, so there were 5,038 annotated scans in total. We randomly split the 5,038  
235 scans into 3,192 and 1,846 scans for training and testing. Each CT scan consists of 319~1,051 slices  
236 of 512×512 pixels, and have a voxel spatial resolution of  $([0.523\sim 0.977] \times [0.523\sim 0.977] \times 0.5)\text{mm}^3$ ,  
237 acquired on Siemens MDCT scanners. We split the union of the four Cohorts into training and test  
238 sets. The training set contains a total of 3,192 CT scans (560×2 PDACs, 205×2 Cysts, 300×2 PanNETs  
239 and 531×2 Normals. For the 1,846 (i.e., 923×2) testing set, it contains 215×2 PDACs, 253×2 Cysts,  
240 150×2 PanNETs and 305×2 Normals. This was a retrospective study approved by Johns Hopkins  
241 Hospital institutional review board. Pancreatic protocol CTs were retrospectively identified from  
242 clinical, pathological and radiological databases compiled between 2003 and 2020. Total 1,982  
243 patients with pathologically proven 686 PDAC and 286 PNET were retrospectively collected from  
244 Radiology and Pathology databases. 799 renal donors without pancreatic tumors were considered  
245 to be normal controls for classification purposes. Most (99%) of these renal donor cases were  
246 collected prior to 2010 so as to ensure that they did not develop pancreatic disease following their  
247 scans.

248 *Cohort 3* consisted of 246 subjects with 399 abnormal CT scans. Slice thickness ranges from 1~5mm.  
249 The scans were acquired on GE (39%), Siemens (38%), Phillips (12%), and Toshiba (11%) scanners.

250 *Cohort 4* consisted of 82 abdominal contrast enhanced venous phase CT scans. The scans had res-  
251 olutions of 512×512 pixels with varying pixel sizes and slice thicknesses between 1.5~2.5mm, and  
252 were acquired on Philips and Siemens MDCT scanners. The National Institutes of Health Clinical  
253 Center performed 82 abdominal contrast enhanced 3D CT scans (~70 seconds after intravenous



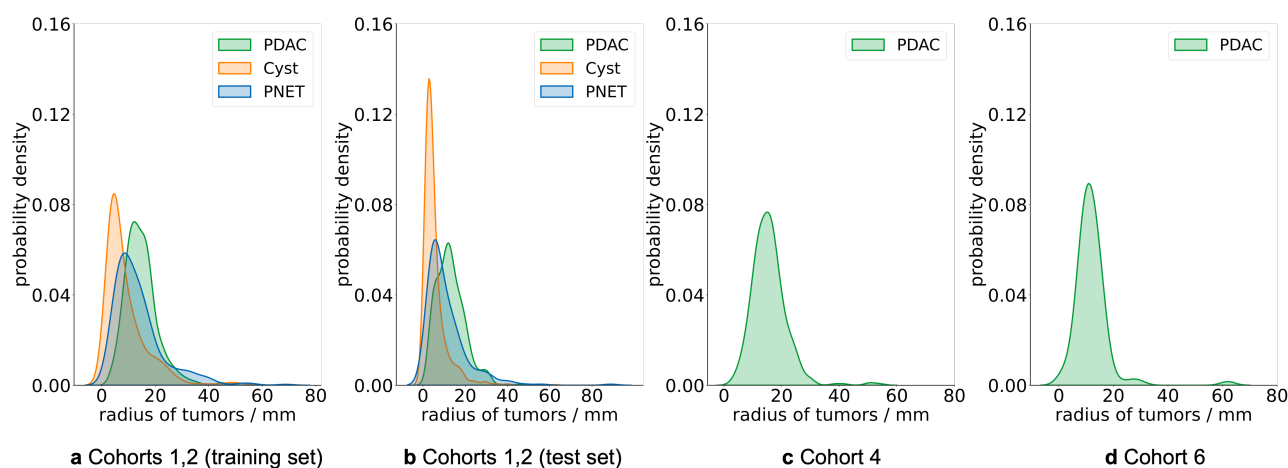

**Figure 6.** Tumor size distributions in Cohorts 1–2 (training set), Cohorts 1–2 (test set), Cohort 4, and Cohort 6.

254 contrast injection in portal-venous) from 53 male and 27 female subjects. Seventeen of the sub-  
255 jects are healthy kidney donors scanned prior to nephrectomy. The remaining 65 patients were  
256 selected by a radiologist from patients who neither had major abdominal pathologies nor pancre-  
257 atic cancer lesions.

258 *Cohorts 5, 6* consisted of 242 dual phase CT scans, among which 78 cases were abnormal (Table  
259 9). Most scans included the whole upper body of the patient in addition to the abdomen. In 77  
260 cases, subjects were rotated along the vertical axis, with a degree ranges from 30 to 60. In the  
261 pre-processing stage of FELIX 1.2, arterial scans were aligned to venous scans with isometric trans-  
262 formations, so that the rotations in the venous phase were kept. CT scans had resolutions of  
263 512×512 pixels with varying pixel sizes (0.57~0.97mm), and slice thickness between 0.64~2.0mm,  
264 acquired on Siemens MDCT scanners.

### 265 **Establishment of Ground-truth by manual annotation**

266 The whole three-dimensional volumes of pancreas and tumors were manually segmented by five  
267 trained annotators using commercial segmentation software. For the subjects with dual-phase CT  
268 images, pancreas and pancreatic tumors were separately annotated in both arterial and venous  
269 phases by one of the five annotators. The boundaries and tumor locations of each subject were  
270 then verified by one of three additional experienced radiologists, none of whom performed the  
271 annotations.

272 System and human errors can affect the training and evaluation of machine learning algorithms.  
273 Therefore, data cleaning, corrections of errors after the initial data is obtained, was an important  
274 step. Possible human mistakes and intra-/inter- observer variations were first visually checked  
275 for by human experts. Errors or major inconsistencies by missing annotation of a slice or a part  
276 of organ with region of interest (ROI) were then doubly-checked by our in-house software. ROI  
277 information, in which the annotated target abdominal structures were recorded, were computed  
278 by the software and used for training and testing. Radiologist re-review, see Appendix 2, was used  
279 to correct for errors in the ground truth which can occur, for example, if a small tumor was not  
280 annotated or if its annotated location was slightly incorrect.

### 281 **Algorithm Development**

282 Our goal is to detect the pancreas and three types of tumors from unaligned venous and arterial  
283 CT scans. We address this goal using deep networks trained for semantic segmentation (*Isensee*  
284 *et al., 2021*). We used the U-Net architecture as the basic segmentation method. This consists of a  
285 shared Siamese encoder for encoding images to features and a decoder for projecting features to

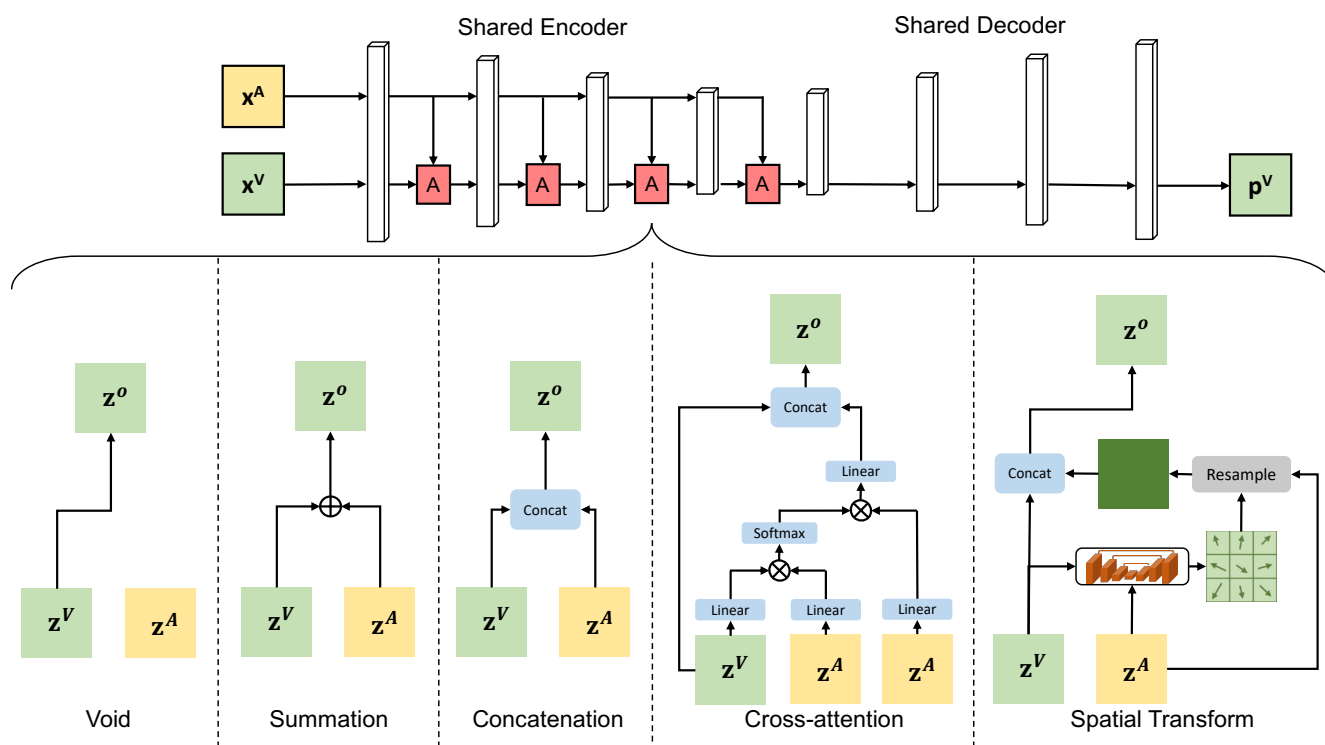

**Figure 7.** An illustration of FELIX 1.0 and the proposed auto-alignment for dual-phase scans. During the search process, an auto-alignment module is inserted after every encoder block to perform a dual-phase feature alignment, where the alignment operations can be chosen from the following: void (no alignment), summation, concatenation, cross-attention, and spatial transform. We note that this search space includes both alignment location and operation.

286 predictions. The input of the network can be either dual-phase scans or single-phase (venous or  
 287 arterial) scan, and the output is the segmentation prediction. For dual phase, to include informa-  
 288 tion from both venous and arterial scans, we designed an auto-alignment module that can register  
 289 and align the two phases. This auto-alignment module is inserted at the end of different encoder  
 290 blocks. It contains a variety of alignment operation such as summation, concatenation, spatial  
 291 transform, and cross attention (illustrated in Figure 7). We used neural architecture search over  
 292 the set of alignment operations to optimize performance. Postprocessing was applied after the  
 293 networks to decrease the number of false positives as a result of the prediction of lesions outside  
 294 the pancreas by the algorithms.

295 **FELIX 1.0.** FELIX 1.0 can process either dual-phase or single-phase scans. The alternative versions  
 296 (FELIX 1.1-1.3) are the extensions of FELIX 1.0 for different tasks.

297 *Single-phase algorithm:* We used 3D U-Net (Çiçek et al., 2016; Falk et al., 2019), which is a sym-  
 298 metric architecture consisting of encoder and decoder sub-networks. The encoder sub-network  
 299 took the input image and reduced the spatial resolution in successive layers while increasing the  
 300 channels; the decoder sub-network increased the spatial resolution while reducing the channels.  
 301 Four residual blocks were used between poolings in the encoder and bilinear interpolations in the  
 302 decoder. In the end, a  $1 \times 1 \times 1$  convolution was used to map the channels to the desired number  
 303 of classes, e.g., background, pancreas, PDAC, Cyst, PanNET, etc. Skip connections were used be-  
 304 tween the encoder and decoder sub-networks to recover fine-grained details of the target objects,  
 305 allowing U-Net to segment fine-grained structures such as small tumors.

306 *Dual-phase algorithm:* Following previous studies (Zhou et al., 2019; Zhu et al., 2019), the dual-  
 307 phase algorithm used arterial to help venous prediction. Unlike single-phase algorithm, the U-Net  
 308 structure for dual phase consisted of a shared Siamese encoder to encode images to features and

309 a decoder to project features to predictions. The input of the dual-phase algorithm is a pair of  
310 venous and arterial scans, and the output is the segmentation prediction of the venous scan. To in-  
311 corporate information from both venous and arterial scans, we design an auto-alignment module  
312 that can determine the operation of dual-phase alignment. The possible alignment operation in-  
313 cludes void (no alignment), summation, concatenation, cross attention, and spatial transform. The  
314 auto-alignment module is inserted at the end of different encoder blocks. Instead of using a hand-  
315 designed architecture, we learn the architecture by Neural Architecture Search (NAS) (*Elsken et al.,*  
316 *2019*) (illustrated in Figure 7). Formally, the entire dataset is denoted as  $\mathcal{D} = \{(\mathbf{x}_i^V, \mathbf{x}_i^A, \mathbf{y}_i^V) | i = 1, 2, \dots, n\}$ ,  
317 where  $n$  is the total number of subjects,  $\mathbf{x}_i^V \in \mathbb{R}^{H_i^V \times W_i^V \times D_i^V}$ ,  $\mathbf{x}_i^A \in \mathbb{R}^{H_i^A \times W_i^A \times D_i^A}$  are venous and arterial  
318 CT scans of the  $i$ -th subject, and  $\mathbf{y}_i^V \in \mathbb{L}^{H_i^V \times W_i^V \times D_i^V}$  is the voxel-wise annotated label in the venous  
319 scan. Here,  $\mathbb{L} = \{0, 1, 2, 3\}$  represents our segmentation targets, i.e., background, healthy pancreas  
320 tissue, pancreatic duct (crucial for PDAC clinical diagnoses), and PDAC mass. Our goal is to find a  
321 mapping function  $\mathcal{F}$  whose inputs and outputs are a pair of two-phase scans  $\mathbf{x}^V, \mathbf{x}^A$  and segmen-  
322 tation results  $\mathbf{p}^V$ , respectively, i.e.,  $\mathbf{p}^V = \mathcal{F}(\mathbf{x}^V, \mathbf{x}^A)$ . We denote the encoded features of the arterial  
323 and venous scans at a certain level by  $\mathbf{z}^V$  and  $\mathbf{z}^A$ . An alignment operation aims to align and fuse the  
324 dual-phase features. We denote by  $\mathbf{z}^O$  the output feature map after a certain alignment operation.  
325 The following operations are considered for alignment: (1) *Void*: The venous and arterial features  
326 do not align with each other:  $\mathbf{z}^O = \mathbf{z}^V$ . (2) *Summation*: The output features are the element-wise  
327 summation of venous and arterial features:  $\mathbf{z}^O = \mathbf{z}^V + \mathbf{z}^A$ . (3) *Concatenation*: The output features  
328 are the concatenation of venous and arterial features along the channel dimension:  $\mathbf{z}^O = \mathbf{z}^V \oplus \mathbf{z}^A$ ,  
329 where  $\oplus$  denotes the concatenation operation of the two vectors. (4) *Cross-attention*: We consider  
330 two-phase collaboration in a non-local attention manner, which can globally encode each location  
331 in the venous features by receiving information from the entire arterial features. Conceptually,  
332  $\mathbf{z}^O = \mathbf{z}^V \oplus (\text{softmax}(\mathbf{z}^V \mathbf{z}^A) \mathbf{z}^A)$  (5) *Spatial transform*: Spatial transform (*Jaderberg et al., 2015*) was  
333 widely adopted in the task of registration between two images. We consider it as an operation  
334 which can handle the large offsets between the venous and arterial scans. The spatial transform  
335 was applied to the arterial scan only. Specifically, we use a light-weighted U-Net to first estimate a  
336 deformation field  $\phi$  of the arterial feature map  $\mathbf{z}^A$  to the venous feature map  $\mathbf{z}^V$ . Afterwards, we  
337 fuse the deformed arterial feature map to the venous feature map by concatenation. This process  
338 can be formulated as follows:  $\mathbf{z}^O = \mathbf{z}^V \oplus (\phi \circ \mathbf{z}^A)$ , where  $\oplus$  and  $\circ$  denote the concatenation of two  
339 tensors and the element-wise deformation operations on a tensor, respectively.

340 **FELIX 1.1.** In addition to pancreas segmentation, FELIX 1.1 was capable of detecting and segment-  
341 ing PDACs from either single-phase or dual-phase scans. This involved two stages: pancreas de-  
342 tection and tumor segmentation. In the first stage, we used FELIX 1.0 to detect the rough location  
343 of the pancreas from the whole CT scan and place a bounding box that surrounds the pancreas.  
344 The first stage could 100% accurately localize the pancreas, with a DSC score of 87% and 86% for  
345 dual-phase and single-phase algorithms, respectively. The second stage took the cropped CT sub-  
346 volume as input (in the center of the bounding box of the pancreas) and used a U-Net to segment  
347 the pancreas into normal voxels and voxels that belong to PDACs. The DSC of PDAC localization  
348 obtained by FELIX 1.1 averaged 65% and the DSC for the venous or arterial phase along averaged  
349 63% on the test set (Figure 5a).

350 **FELIX 1.2.** To enable the algorithms to generalize to data from other institutions, we created a  
351 much bigger training dataset by applying data augmentation techniques to the JHH data, including  
352 3D rotations of the CT scans and adjusting other scan properties such as slice thickness (normalized  
353 to 30mm). The increased variety of training data enabled us to train a much larger deep network,  
354 created by adding a few extra components to our original network, which was able to exploit the  
355 extra training data without overfitting. The single-phase algorithm was used for external data such  
356 as Cohort 3 and Cohort 4 because only venous-phase scans were provided.

357 **FELIX 1.3.** This algorithm aims at detecting and recognizing two other tumor types (pancreatic cysts  
358 and PanNETs) in addition to FELIX 1.1 that detects PDACs. Cysts and PanNETs exhibit varying tex-

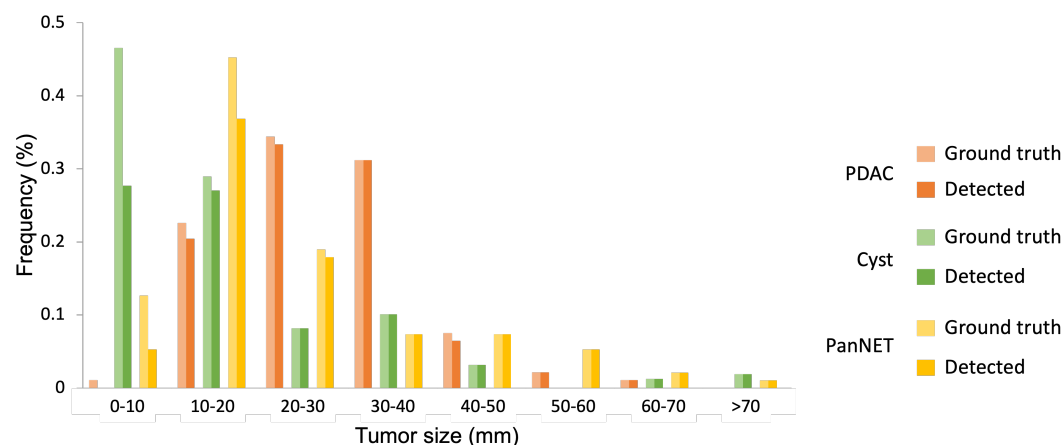

**Figure 8.** Performance of pancreatic tumor detection stratified by tumor size. The smallest tumor we detected was 2mm. Our false negatives are mostly smaller than 20mm, frequently smaller than 10mm. We increase sensitivity to small tumors by multi-scale training.

359 ture patterns and tumor sizes (Figure 6). To improve the detection and localization of very small  
 360 tumors, we applied standard multi-scale techniques that processed the CT scans at different levels  
 361 of resolution and then combined the results. we train a multi-scale algorithm on JHH data and eval-  
 362 uate it on Cohorts 7-8 with five scales (1.0, 1.25, 1.5, 1.75, 2.0), then we further merge those results  
 363 from different scales. Without multi-scale training, our dual-phase algorithm can obtain 83.4% sen-  
 364 sitivity of detecting small tumors. The multiscale training strategy greatly improves performance,  
 365 achieving an overall sensitivity of 88.7% (+5.3) before radiologist re-review and 89.3% (+5.9) after  
 366 radiologist re-review for small tumors, while the specificity remains competitive (88.2%) to base  
 367 algorithms. The smallest lesion we detected was 2mm radius. Performance of pancreatic tumor  
 368 detection stratified by tumor size is presented in Figure 8, and examples of small tumor detection  
 369 are illustrated in Figure 9.

370 **Post-processing.** The post-processing stage is to eliminate most false positives using a variety of  
 371 cues, such as prediction size, distance from the pancreas, and several handcrafted features. These  
 372 cues are usually not fully exploited by deep learning algorithms. First, for PDAC detection, we  
 373 discard the predicted components with less than 500 voxels; for Cyst and PanNET detection, we  
 374 discard the predicted components with less than 30 voxels. Second, we dismissed the predictions  
 375 if the surface of the predicted tumor is not attached with the surface of the predicted pancreas.  
 376 Third, handcrafted features were extracted from four different perspectives, i.e., uncertainty, qual-  
 377 ity assessment, shape, and geometry. We used a two-way cross-validation on the validation set for  
 378 hyper-parameters tuning to compute these imaging features. A sequential feature selection (*Ferri*  
 379 *et al., 1994*) was then conducted on the hybrid feature pool. Specifically, starting from an empty set,  
 380 we picked one feature at a time from the remaining feature pool that minimized a validation loss.  
 381 Consequently, we adopted VAE, sphericity, and surface volume ratio for PDAC detection, uncer-  
 382 tainty, VAE, and sphericity for Cyst and PanNET detection. A predicted component was considered  
 383 as positive only if all these imaging features agree it is positive.

384 (1) *Uncertainty:* We hypothesize that segmentation with bad quality is more likely to be a false  
 385 positive. Inspire by *Jungo et al. (2018)*, we used an entropy-based uncertainty to assess the qual-  
 386 ity of segmentation and distinguish between false positives and true positives. We calculate the  
 387 uncertainty in a way by accumulating the entropy on the voxel that is predicted as lesion in  $\mathbf{p}^V$ .  
 388 Specifically, we have

$$f_{\text{entropy}} = -\frac{1}{|\Omega|} \sum_{i \in \Omega} \sum_{c \in \mathbb{N}} \mathbb{P}(\mathbf{p}_i^V = c) \log \mathbb{P}(\mathbf{p}_i^V = c), \quad (1)$$

389 where  $\Omega = \{i \mid \arg \max_{c \in \mathbb{N}} \mathbb{P}(\mathbf{p}_i^V = c) = \text{lesion}\}$ .



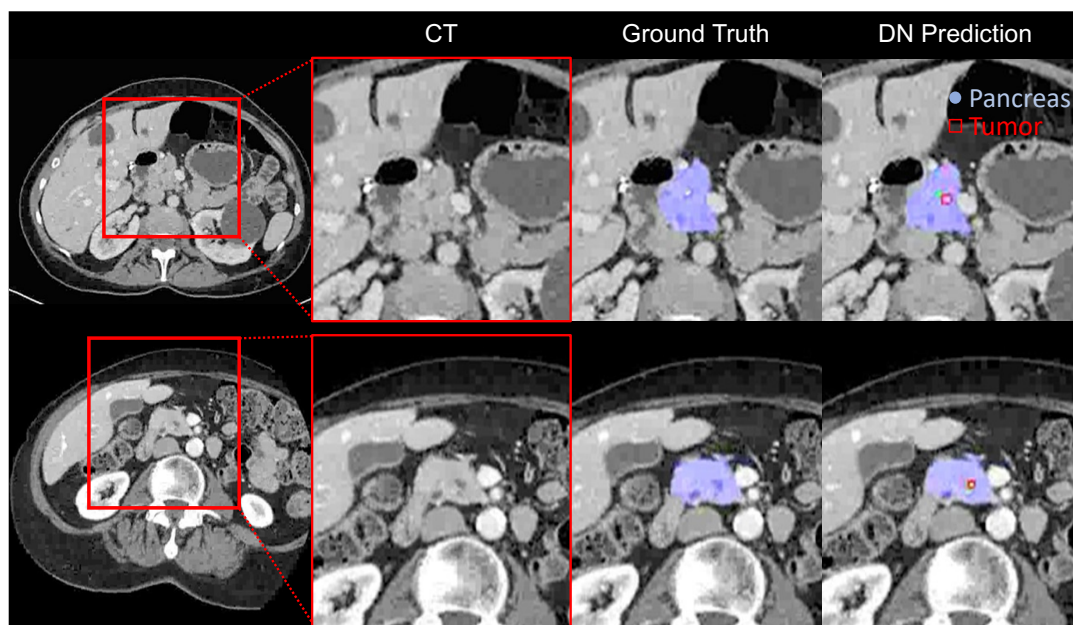

**Figure 9.** Our multiscale algorithm can detect Cysts that were not annotated by radiologists. These predictions were verified to be correct through radiologist re-review. Top: Cyst of 2mm radius. Bottom: Cyst of 4mm radius.

390 (2) *VAE*: A variational autoencoder (VAE) is learned to reconstruct the ground truth and then the  
 391 reconstruction error is used to evaluate the segmentation quality. The quality assessment feature  
 392 is usually targeted at anomaly detection (*Liu et al., 2019*). In false positive reduction, we treat the  
 393 properties within tumor region as target distribution so that the false positives, which do not corre-  
 394 spond to tumor region become anomalies. Shape and texture can represent orthogonal properties  
 395 of pancreatic lesions so that they provide complementary cues when combined together. Specifi-  
 396 cally,

$$f_{\text{vae}} = \text{DSC}(\mathbf{p}^V, \text{VAE}(\mathbf{p}^V)), \quad (2)$$

397 where  $\text{DSC}(\cdot)$  is the function to calculate dice coefficient, formulated in Equation 6.

398 (3) *Surface volume ratio*: We adopted the ratio between surface and volume of a predicted compo-  
 399 nent to reject false positives by analyzing shape features. A lower ratio indicates a more compact  
 400 (sphere-like) shape.

$$f_{\text{surface volume ratio}} = \frac{A}{V}. \quad (3)$$

401 Surface area ( $A$ ) is obtained by taking the number of all voxels that belong to the edges of a pre-  
 402 dicted component. Mesh volume ( $V$ ) is the total number of voxels in a predicted component.

403 (4) *Sphericity*: Sphericity is the ratio of the surface area of a sphere to the surface area of the parti-  
 404 cle (*Van Griethuysen et al., 2017*). Sphericity measures the roundness of the shape of the tumor  
 405 region relative to a sphere. It has a value in the range of  $[0, 1]$ , where a value of 1 indicates a perfect  
 406 sphere.

$$f_{\text{sphericity}} = \frac{\sqrt[3]{36\pi V^2}}{A} \quad (4)$$

#### 407 **Algorithm Evaluation**

408 For classification of PDAC and non-PDAC cases, we report sensitivity (also known as true-positive  
 409 rate) and specificity (as known as true-negative rate), defined as:

$$\text{Sensitivity} = \frac{TP}{TP + FN}, \quad \text{Specificity} = \frac{TN}{TN + FP}, \quad (5)$$

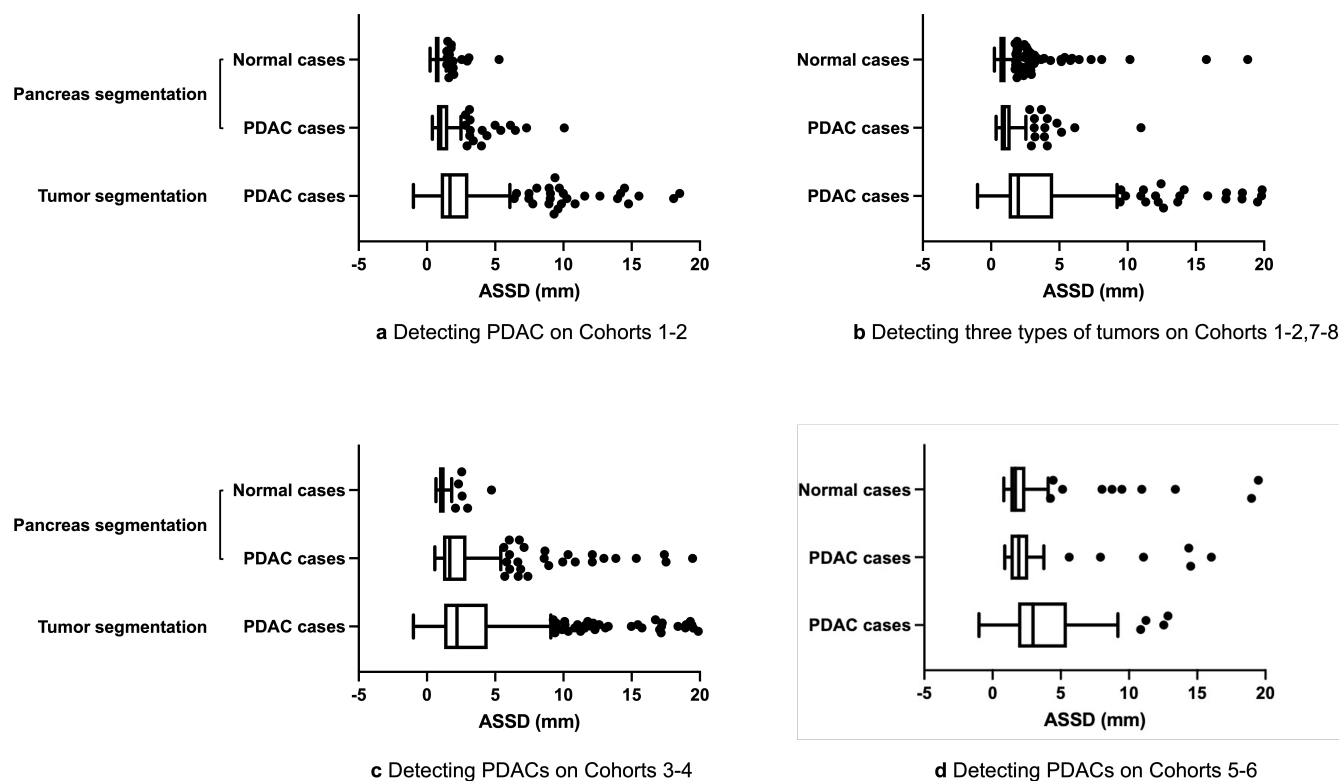

**Figure 10.** Quantitative performance of pancreas segmentation and tumor localization, evaluated by average symmetric surface distance (ASSD).

410 where TP, TN, FP, FN denote the number of true positives, true negatives, false positives, false  
 411 negatives, respectively. Pie plots of sensitivity and specificity were presented in Figure 4.

412 We report two metrics, DSC (Dice similarity coefficient) and ASSD (average symmetric surface  
 413 distance), to measure the segmentation performance. Box plots of these two measures were pre-  
 414 sented in Figure 5 and Figure 10, respectively. The DSC score is commonly used as an evaluation  
 415 metric and takes a value of 0 when both masks do not overlap at all and 1 for perfect overlap.

$$DSC = \frac{2 \times TP}{(TP + FP) + (TP + FN)}. \quad (6)$$

416 ASSD measures the average distance between the surface of the tumor/organ segmentation result  
 417 to the nearest boundary voxels of the ground truth in 3D. It has a value in the range of  $[0, \infty]$ . They  
 418 are used to measure the area similarity and the boundary or shape similarity, respectively. A better  
 419 segmentation algorithm produces a larger value of DSC while a smaller value of ASSD.

#### 420 Acknowledgments

421 This work was supported by the Lustgarten Foundation for Pancreatic Cancer Research, the Vir-  
 422 ginia and D.K. Ludwig Fund for Cancer Research, the Sol Goldman Charitable Trust, and NIH Grant  
 423 #CA06973.

#### 424 Competing interests

425 BV, KWK are founders of Thrive Earlier Detection, an Exact Sciences Company, and KWK is a consul-  
 426 tant to Thrive. BV & KWK hold equity in Exact Sciences. BV and KWK are founders of or consultants  
 427 to Haystack BV is a consultant to and holds equity in Catalio Capital Management EF is a consultant  
 428 to Exact Sciences. Patent applications on the work described in this paper may be filed by Johns  
 429 Hopkins University.

## References

- 430  
431 **Antonelli M**, Reinke A, Bakas S, Farahani K, Kopp-Schneider A, Landman BA, Litjens G, Menze B, Ronneberger  
432 O, Summers RM, et al. The medical segmentation decathlon. *Nature communications*. 2022; 13(1):1–13.
- 433 **Chen PT**, Chang D, Wu T, Wu MS, Wang W, Liao WC. Applications of artificial intelligence in pancreatic and  
434 biliary diseases. *Journal of Gastroenterology and Hepatology*. 2021; 36(2):286–294.
- 435 **Chen PT**, Wu T, Wang P, Chang D, Liu KL, Wu MS, Roth HR, Lee PC, Liao WC, Wang W. Pancreatic cancer detection  
436 on CT scans with deep learning: a nationwide population-based study. *Radiology*. 2022; p. 220152.
- 437 **Chu LC**, Goggins MG, Fishman EK. Diagnosis and detection of pancreatic cancer. *The Cancer Journal*. 2017;  
438 23(6):333–342.
- 439 **Chu LC**, Park S, Kawamoto S, Fouladi DF, Shayesteh S, Zinreich ES, Graves JS, Horton KM, Hruban RH, Yuille AL,  
440 et al. Utility of CT Radiomics features in differentiation of pancreatic ductal adenocarcinoma from normal  
441 pancreatic tissue. *American Journal of Roentgenology*. 2019; 213(2):349–357.
- 442 **Çiçek Ö**, Abdulkadir A, Lienkamp SS, Brox T, Ronneberger O. 3D U-Net: learning dense volumetric segmenta-  
443 tion from sparse annotation. In: *International conference on medical image computing and computer-assisted*  
444 *intervention* Springer; 2016. p. 424–432.
- 445 **Consortium NCICPTA**, et al. Radiology Data From the Clinical Proteomic Tumor Analysis Consortium Lung  
446 Squamous Cell Carcinoma [Cptac-Lsccl] Collection [Data Set]. *Cancer Imaging Arch*. 2018; 10:k9.
- 447 **Elsken T**, Metzen JH, Hutter F. Neural architecture search: A survey. *The Journal of Machine Learning Research*.  
448 2019; 20(1):1997–2017.
- 449 **Falk T**, Mai D, Bensch R, Çiçek Ö, Abdulkadir A, Marrakchi Y, Böhm A, Deubner J, Jäckel Z, Seiwald K, et al. U-Net:  
450 deep learning for cell counting, detection, and morphometry. *Nature methods*. 2019; 16(1):67–70.
- 451 **Ferri FJ**, Pudil P, Hatef M, Kittler J. Comparative study of techniques for large-scale feature selection. In: *Machine*  
452 *Intelligence and Pattern Recognition*, vol. 16 Elsevier; 1994.p. 403–413.
- 453 **Fu S**, Lu Y, Wang Y, Zhou Y, Shen W, Fishman E, Yuille A. Domain adaptive relational reasoning for 3d multi-organ  
454 segmentation. In: *International Conference on Medical Image Computing and Computer-Assisted Intervention*  
455 Springer; 2020. p. 656–666.
- 456 **Gonoi W**, Hayashi TY, Okuma H, Akahane M, Nakai Y, Mizuno S, Tateishi R, Isayama H, Koike K, Ohtomo K.  
457 Development of pancreatic cancer is predictable well in advance using contrast-enhanced CT: a case-cohort  
458 study. *European radiology*. 2017; 27(12):4941–4950.
- 459 **Heinrich MP**, Jenkinson M, Brady M, Schnabel JA. MRF-based deformable registration and ventilation estima-  
460 tion of lung CT. *IEEE transactions on medical imaging*. 2013; 32(7):1239–1248.
- 461 **Isensee F**, Jaeger PF, Kohl SA, Petersen J, Maier-Hein KH. nnU-Net: a self-configuring method for deep learning-  
462 based biomedical image segmentation. *Nature Methods*. 2021; 18(2):203–211.
- 463 **Jaderberg M**, Simonyan K, Zisserman A, et al. Spatial transformer networks. *Advances in neural information*  
464 *processing systems*. 2015; 28:2017–2025.
- 465 **Jungo A**, Meier R, Ermis E, Herrmann E, Reyes M. Uncertainty-driven sanity check: application to postoperative  
466 brain tumor cavity segmentation. *arXiv preprint arXiv:180603106*. 2018; .
- 467 **Landman B**, Xu Z, Igelsias J, Styner M, Langerak T, Klein A. MICCAI multi-atlas labeling beyond the cranial vault-  
468 workshop and challenge. In: *Proc. MICCAI Multi-Atlas Labeling Beyond Cranial Vault—Workshop Challenge*, vol. 5;  
469 2015. p. 12.
- 470 **LeCun Y**, Bengio Y, Hinton G. Deep learning. *nature*. 2015; 521(7553):436.
- 471 **Liu F**, Xia Y, Yang D, Yuille AL, Xu D. An alarm system for segmentation algorithm based on shape model. In:  
472 *Proceedings of the IEEE/CVF International Conference on Computer Vision*; 2019. p. 10652–10661.
- 473 **Luo X**, Liao W, Xiao J, Song T, Zhang X, Li K, Metaxas DN, Wang G, Zhang S. WORD: A large scale dataset,  
474 benchmark and clinical applicable study for abdominal organ segmentation from CT image. *arXiv preprint*  
475 *arXiv:211102403*. 2021; .

- 476 **Ma J**, Zhang Y, Gu S, Zhu C, Ge C, Zhang Y, An X, Wang C, Wang Q, Liu X, et al. Abdomenct-1k: Is abdominal organ  
477 segmentation a solved problem. *IEEE Transactions on Pattern Analysis and Machine Intelligence*. 2021; .
- 478 **Man Y**, Huang Y, Feng J, Li X, Wu F. Deep Q learning driven ct pancreas segmentation with geometry-aware  
479 u-net. *IEEE transactions on medical imaging*. 2019; 38(8):1971–1980.
- 480 **Mukherjee S**, Patra A, Khasawneh H, Korfiatis P, Rajamohan N, Suman G, Majumder S, Panda A, Johnson MP,  
481 Larson NB, et al. Radiomics-Based Machine-Learning Models Can Detect Pancreatic Cancer on Prediagnostic  
482 CTs at a Substantial Lead Time Prior to Clinical Diagnosis. *Gastroenterology*. 2022; .
- 483 **Perone CS**, Ballester P, Barros RC, Cohen-Adad J. Unsupervised domain adaptation for medical imaging seg-  
484 mentation with self-ensembling. *NeuroImage*. 2019; 194:1–11.
- 485 **Pooch EH**, Ballester P, Barros RC. Can we trust deep learning based diagnosis? the impact of domain shift  
486 in chest radiograph classification. In: *International Workshop on Thoracic Image Analysis* Springer; 2020. p.  
487 74–83.
- 488 **Rahib L**, Smith BD, Aizenberg R, Rosenzweig AB, Fleshman JM, Matrisian LM. Projecting cancer incidence and  
489 deaths to 2030: the unexpected burden of thyroid, liver, and pancreas cancers in the United States. *Cancer*  
490 *research*. 2014; 74(11):2913–2921.
- 491 **Roth HR**, Farag A, Turkbey EB, Lu L, Liu J, Summers RM. Data from pancreas-CT. The cancer imaging archive.  
492 2016; 32.
- 493 **Roth HR**, Lu L, Farag A, Shin HC, Liu J, Turkbey EB, Summers RM. Deeporgan: Multi-level deep convolutional  
494 networks for automated pancreas segmentation. In: *International conference on medical image computing*  
495 *and computer-assisted intervention* Springer; 2015. p. 556–564.
- 496 **Roth HR**, Lu L, Farag A, Sohn A, Summers RM. Spatial aggregation of holistically-nested networks for automated  
497 pancreas segmentation. In: *International Conference on Medical Image Computing and Computer-Assisted In-*  
498 *tervention* Springer; 2016. p. 451–459.
- 499 **Ryan DP**, Hong TS, Bardeesy N. Pancreatic adenocarcinoma. *New England Journal of Medicine*. 2014;  
500 371(11):1039–1049.
- 501 **Van Griethuysen JJ**, Fedorov A, Parmar C, Hosny A, Aucoin N, Narayan V, Beets-Tan RG, Fillion-Robin JC, Pieper  
502 S, Aerts HJ. Computational radiomics system to decode the radiographic phenotype. *Cancer research*. 2017;  
503 77(21):e104–e107.
- 504 **Vercauteren T**, Pennec X, Perchant A, Ayache N. Diffeomorphic demons: Efficient non-parametric image reg-  
505 istration. *NeuroImage*. 2009; 45(1):S61–S72.
- 506 **Wang Y**, Zhou Y, Shen W, Park S, Fishman EK, Yuille AL. Abdominal multi-organ segmentation with organ-  
507 attention networks and statistical fusion. *Medical image analysis*. 2019; 55:88–102.
- 508 **Wasserthal J**, Meyer M, Breit HC, Cyriac J, Yang S, Segeroth M. TotalSegmentator: robust segmentation of 104  
509 anatomical structures in CT images. *arXiv preprint arXiv:220805868*. 2022; .
- 510 **Xia Y**, Xie L, Liu F, Zhu Z, Fishman EK, Yuille AL. Bridging the gap between 2d and 3d organ segmentation  
511 with volumetric fusion net. In: *International Conference on Medical Image Computing and Computer-Assisted*  
512 *Intervention* Springer; 2018. p. 445–453.
- 513 **Xia Y**, Yu Q, Shen W, Zhou Y, Fishman EK, Yuille AL. Detecting pancreatic ductal adenocarcinoma in multi-phase  
514 CT scans via alignment ensemble. In: *International Conference on Medical Image Computing and Computer-*  
515 *Assisted Intervention* Springer; 2020. p. 285–295.
- 516 **Yu Q**, Xie L, Wang Y, Zhou Y, Fishman EK, Yuille AL. Recurrent saliency transformation network: Incorporating  
517 multi-stage visual cues for small organ segmentation. In: *Proceedings of the IEEE Conference on Computer*  
518 *Vision and Pattern Recognition*; 2018. p. 8280–8289.
- 519 **Yuille AL**, Liu C. Deep nets: What have they ever done for vision? *International Journal of Computer Vision*.  
520 2021; 129(3):781–802.
- 521 **Zhang L**, Shi Y, Yao J, Bian Y, Cao K, Jin D, Xiao J, Lu L. Robust pancreatic ductal adenocarcinoma segmenta-  
522 tion with multi-institutional multi-phase partially-annotated CT scans. In: *International Conference on Medical*  
523 *Image Computing and Computer-Assisted Intervention* Springer; 2020. p. 491–500.



- 524 **Zhang L**, Wang X, Yang D, Sanford T, Harmon S, Turkbey B, Wood BJ, Roth H, Myronenko A, Xu D, et al. Gener-  
525 alizing deep learning for medical image segmentation to unseen domains via deep stacked transformation.  
526 *IEEE transactions on medical imaging*. 2020; 39(7):2531–2540.
- 527 **Zhao T**, Cao K, Yao J, Nogues I, Lu L, Huang L, Xiao J, Yin Z, Zhang L. 3D graph anatomy geometry-integrated  
528 network for pancreatic mass segmentation, diagnosis, and quantitative patient management. In: *Proceedings*  
529 *of the IEEE/CVF Conference on Computer Vision and Pattern Recognition*; 2021. p. 13743–13752.
- 530 **Zhou Y**, Li Y, Zhang Z, Wang Y, Wang A, Fishman EK, Yuille AL, Park S. Hyper-Pairing Network for Multi-Phase  
531 Pancreatic Ductal Adenocarcinoma Segmentation. In: *International Conference on Medical Image Computing*  
532 *and Computer-Assisted Intervention* Springer; 2019. p. 155–163.
- 533 **Zhou Y**, Xie L, Shen W, Wang Y, Fishman EK, Yuille AL. A fixed-point model for pancreas segmentation in ab-  
534 dominal CT scans. In: *International Conference on Medical Image Computing and Computer-Assisted Intervention*  
535 Springer; 2017. p. 693–701.
- 536 **Zhu Z**, Lu Y, Shen W, Fishman EK, Yuille AL. Segmentation for Classification of Screening Pancreatic Neuroen-  
537 docrine Tumors. In: *Proceedings of the IEEE/CVF International Conference on Computer Vision (ICCV) Workshops*;  
538 2021. p. 3402–3408.
- 539 **Zhu Z**, Xia Y, Shen W, Fishman E, Yuille A. A 3d coarse-to-fine framework for volumetric medical image segmen-  
540 tation. In: *2018 International Conference on 3D Vision (3DV)* IEEE; 2018. p. 682–690.
- 541 **Zhu Z**, Xia Y, Xie L, Fishman EK, Yuille AL. Multi-scale coarse-to-fine segmentation for screening pancreatic ductal  
542 adenocarcinoma. In: *International conference on medical image computing and computer-assisted intervention*  
543 Springer; 2019. p. 3–12.

## 544 Appendix 1

### 545 Background

546 **Public pancreas CT datasets.** There are several publicly available datasets for pancreas de-  
547 tection/segmentation and tumor detection, such as the Medical Segmentation Decathlon  
548 (MSD) dataset ([Antonelli et al., 2022](#)), the TCIA-PDA dataset ([Consortium et al., 2018](#)), and  
549 the National Institutes of Health Pancreas CT (NIH-Pancreas) dataset ([Roth et al., 2016a](#)).  
550 The MSD pancreas dataset consists of 420 abdomen CTs of subjects with pancreatic lesions  
551 (e.g., intraductal mucinous neoplasms, pancreatic neuroendocrine tumors, or pancreatic  
552 ductal adenocarcinoma) from the Memorial Sloan Kettering Cancer Center. The dataset has  
553 been split into two groups: a training subset ( $n = 281$ ) and a testing subset ( $n = 139$ ). Only the  
554 training subset has voxel-wise pancreas and tumor annotation. All the studies are contrast-  
555 enhanced scans acquired in the venous phase. The TCIA-PDA dataset consists of 6 MRIs  
556 and 60 CTs of subjects from the National Cancer Institute's Clinical Proteomic Tumor Analy-  
557 sis Consortium Pancreatic Ductal Adenocarcinoma (CPTAC-PDA) cohort. Age, gender, tumor  
558 size, histologic type, and grade are available for all the subjects, but voxel-wise tumor or pan-  
559 creas annotation is not available. 57 out of 60 CTs are in venous phase. The NIH-Pancreas  
560 dataset consists of 82 venous phase CTs performed at the NIH Clinical Center on 80 subjects.  
561 All CTs have a morphologically normal pancreas. The dataset provides voxel-wise annota-  
562 tion of pancreas segmentation for all subjects performed by manual slice-by-slice tracings  
563 of the pancreas. In addition, numerous abdominal CT datasets are publicly available with  
564 manual annotation of organ segmentation including the pancreas, but whether these CTs  
565 contain pancreatic tumors is unknown. For example, the Synapse dataset (from the MICCAI  
566 Multi-Atlas Labeling Beyond the Cranial Vault challenge) ([Landman et al., 2015](#)) consists of  
567 30 venous phase CT scans with manual annotation for segmentation of 13 abdominal or-  
568 gans; Abdominal-1K ([Ma et al., 2021](#)) provides more than 1000 CT scans from 12 medical  
569 centers with liver, kidney, pancreas, and spleen annotated; WORD ([Luo et al., 2021](#)) has 150  
570 CT scans with 16 organs annotated; and most recently, TotalSegmentor ([Wasserthal et al.,](#)  
571 [2022](#)) releases 1204 CT scans with 104 anatomical structures annotated. Our curated JHH  
572 dataset is unprecedented in scale, consisting of over 2,500 dual-phase contrast-enhanced  
573 CT scans with full labels of 20 organs as well as exhaustive labels of cysts, ducts, and tumors  
574 in the pancreas.

**AI for pancreas and pancreatic tumor detection.** With the recent advances of deep learning,  
automated pancreas segmentation has achieved tremendous improvements ([Roth et al.,](#)  
[2015, 2016b](#); [Zhou et al., 2017](#); [Yu et al., 2018](#); [Zhu et al., 2018](#); [Xia et al., 2018](#); [Man et al.,](#)  
[2019](#)), which is an essential prerequisite for pancreatic tumor detection ([Xia et al., 2020](#);  
[Zhang et al., 2020a](#); [Zhao et al., 2021](#); [Zhu et al., 2021](#); [Chen et al., 2021](#)). Meanwhile, re-  
searchers are pacing towards automated detection of pancreatic adenocarcinoma (PDAC),  
the most common type of pancreatic tumor (85%) ([Ryan et al., 2014](#)) and with the lowest  
5-year survival rate among cancers ([Rahib et al., 2014](#)). Most existing works used venous-  
phase CT scans for detecting and segmenting pancreatic tumors ([Zhu et al., 2019](#); [Chen](#)  
[et al., 2022](#)). [Zhou et al. \(2019\)](#) developed a hyper-pairing network for PDAC segmenta-  
tion from multi-phase CT scans to integrate information from both arterial and venous  
scans. [Zhang et al. \(2020a\)](#) proposed a framework to improve PDAC segmentation with  
multi-institutional and multi-phase, partially labeled data. They both used traditional image  
registration approaches ([Vercauteren et al., 2009](#); [Heinrich et al., 2013](#)) for pre-alignment  
and then applied a deep network that took the phases as input. Unlike their methods, we  
particularly investigate how to register multiple phases in feature space with more complex

588

589

590

591

592

593

594

595

fusion techniques, either in a manually designed or automated way. There are complimentary AI techniques that used texture features (in particular Radiomics features) of the pancreas, and then trained a random forest algorithms classifier algorithm (*Chu et al., 2019; Mukherjee et al., 2022*). These were able to classify if a pancreas contained a tumor, but were not suitable for localizing the tumor.

596 **Appendix 2**

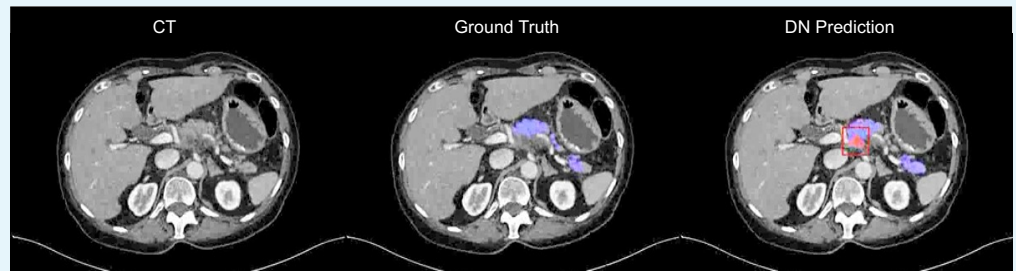

597  
598  
600

**Appendix 2—figure 1.** After radiologist re-review, we verified that the prediction framed in red was a true positive of PDAC but it was missed by annotator.

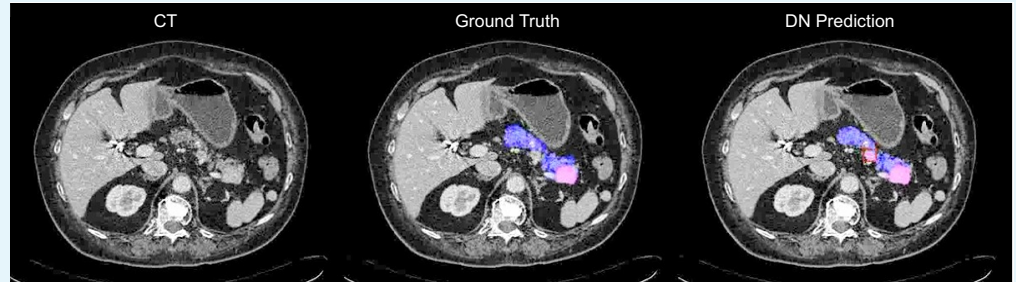

601  
602  
604

**Appendix 2—figure 2.** After radiologist re-review, we verified that the prediction framed in red was a true positive of PanNET but it was missed by annotator.

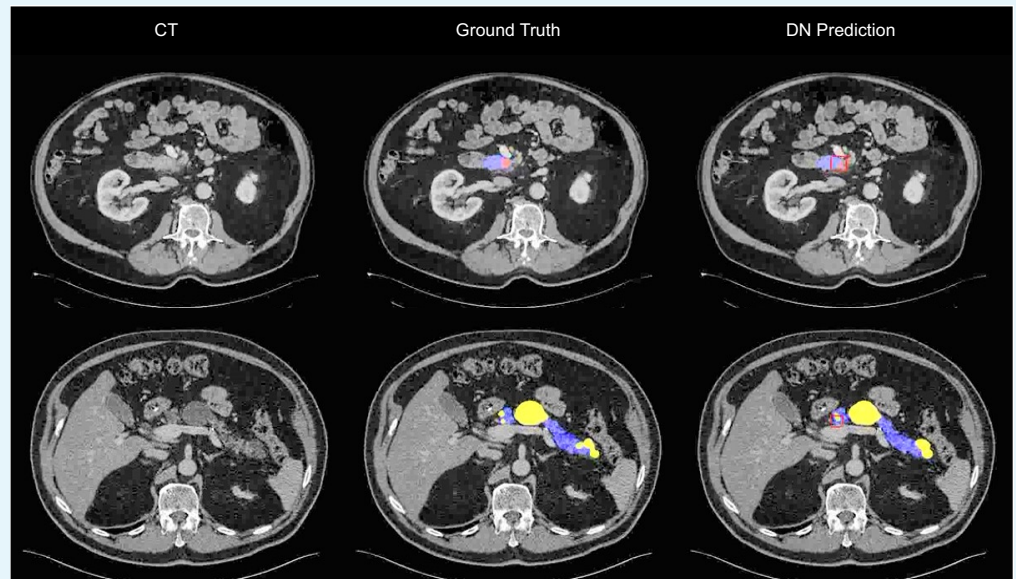

605  
606  
607  
609

**Appendix 2—figure 3.** Visualizations of PDAC (top) and Cyst (bottom) false negatives. Our predictions (framed in red boxes) are close enough to the ground truth and therefore could be counted as true positives after radiologist re-review.

610 **Radiologist Re-review**

**Overview.** After application of the algorithms to the cohorts in this study, radiologists re-reviewed all cases in which there was a discrepancy between the original radiologic annotation of the data and the prediction of the algorithm. In no case was the prediction of the algorithm changed on the basis of this re-review. However, of the 203 cases re-reviewed,



612

613

614

615

616

the original radiologic annotation was found to be erroneous, and this annotation was accordingly changed in the datasets (Tables 1–2).

617

| Radiologist re-review                      | PDAC | Cyst | PanNET | Total |
|--------------------------------------------|------|------|--------|-------|
| TP (close to GT, AI better than GT)        | 4    | 3    | 0      | 7     |
| Exclude (surgery, fluid, not-due-to-stent) | 0    | 1    | 0      | 1     |
| Incorrect annotation (need to be fixed)    | 0    | 0    | 1      | 1     |
| Lymph nodes                                | 0    | 0    | 1      | 1     |
| Classified as duct                         | 0    | 6    | 0      | 6     |

618

620

**Appendix 2—table 1.** Taxonomy of *false negatives* on the test set of Cohorts 1 and 2 using our dual-phase algorithm.

621

| Radiologist re-review                              | PDAC | Cyst | PanNET | Normal | Total |
|----------------------------------------------------|------|------|--------|--------|-------|
| TP (correlate to abnormalities)                    | 15   | 1    | 2      | 0      | 18    |
| TP (close enough, AI predicts better)              | 3    | 0    | 1      | 0      | 4     |
| TP (no label, cyst, serous, IPMN)                  | 10   | 34   | 10     | 3      | 57    |
| Exclude (surgery, fluid, serous, not-due-to-stent) | 3    | 1    | 3      | 0      | 7     |
| Duodenum                                           | 0    | 1    | 0      | 0      | 1     |
| Veins/Vessels/Arteries                             | 3    | 14   | 4      | 5      | 26    |
| Pancreatic duct                                    | 8    | 8    | 7      | 2      | 25    |
| CBD                                                | 3    | 4    | 4      | 3      | 14    |
| SMV                                                | 0    | 4    | 2      | 1      | 7     |
| Focal fat                                          | 0    | 5    | 2      | 9      | 16    |
| Subtle texture change                              | 0    | 2    | 5      | 0      | 7     |
| Splenic artery                                     | 0    | 0    | 2      | 3      | 5     |

622

624

**Appendix 2—table 2.** Taxonomy of *false positives* on the test set of Cohorts 1 and 2 using our dual-phase algorithm.

625

626

627

628

629

630

631

632

633

634

635

636

637

638

Radiologist re-review of the false positives and false negatives showed that the false positives and false negatives of the algorithm were almost always understandable. The false positives mainly corresponded to small regions in the scan that an experienced radiologist would consider suspicious and worth inspecting more closely. By contrast, the false negatives were typically lesions that were also hard for experienced radiologists to detect. Radiologist re-review also enabled us to correct for errors in the ground truth which can occur because: (i) there is a small tumor in the scan which was not annotated, (ii) the tumor was annotated but its location was slightly incorrect (considering the difficulty of annotating the tumors the AI results can be more accurate than the ground truth), and (iii) an area was annotated as tumor, but on re-review no lesion was present. We report results both before and after the radiologist re-review. Some of the false negatives occurred when the AI algorithms predicted tumors very close to the annotations and hence direct radiologists to the rough location (and might, considering the difficulty of annotating tumors, be more accurate than the annotations).

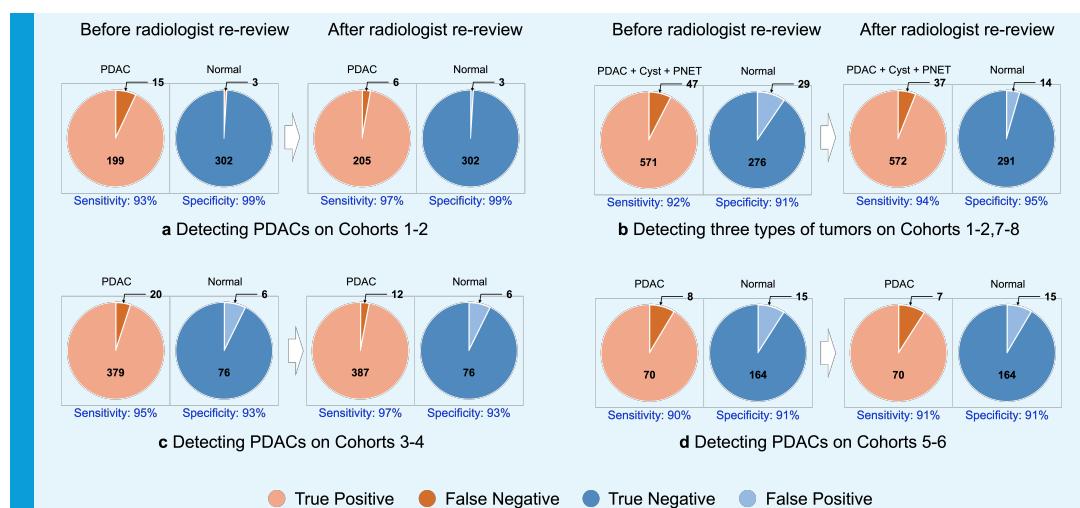

639

640

**Appendix 2—figure 4.** Tumor detection performance before and after radiologist re-review.

642

643

644

645

646

647

648

649

**Recognizing a PDAC within the pancreas.** FELIX 1.1 has sensitivity and specificity of 93.0% and 99.0%. We were able to localize the PDACs fairly accurately, obtaining DSC scores of 65.3%. After radiologist re-review, sensitivity and specificity improved to 96.6% and 99.0% (Figure 4a). Using the venous phase only, FELIX 1.0 gave a sensitivity of 92.5% and a specificity of 93.0% before radiologist re-review and 92.4% and 93.0% after radiologist re-review. We conclude that the AI algorithms trained and tested on the Hopkins dataset attain high sensitivity and specificity, similar to those of radiologists. The algorithms also accurately localize PDACs enabling radiologists to visually inspect specific locations in the scans.

650

651

652

653

654

655

656

657

658

659

660

661

**Recognizing other pancreatic tumor types.** We trained our AI algorithms to detect all these types of tumors while allowing only a few modifications to our algorithms. The overall performance remained high with sensitivity and specificity of 92.4% and 90.5% before radiologist re-review and 93.9% and 95.4% after radiologist re-review (Figure 4b). They only decrease to sensitivity and specificity of 94.4% and 93.0% before radiologist re-review and 94.8% and 94.3% after radiologist re-review if only the venous phase was used. The segmentation/localization of these tumors remained accurate (DSC scores of 87.0% for the pancreas, 62.42% for PDACs, 62.04% for cyst, and 55.16% for PanNETs). The algorithms were even able to detect some cysts as small as 2mm radius/diameter, which is close to the absolute performance limit of radiologists. Radiologist re-review was particularly useful as the algorithms often detected small cysts that had not been originally annotated by radiologists.

662

663

664

665

666

667

668

669

We also studied how performance varied with the size of the tumors. The distributions of sizes of tumors and how size predicted performance are given in Figure 8. We also modified the algorithm slightly as described in Materials & Methods, using multiscale processing, in order to improve performance on tumors with sizes of less than 2cm diameter. This yielded a sensitivity and specificity of 88.7% and 84.9% before radiologist re-review, and 89.33% and 88.20% after. The DSC score for small tumor segmentation was 52.86%. We conclude that the algorithms could also detect and localize these three types of tumors with very high sensitivity and specificity and performed well even on very small tumors.

**Recognizing PDAC in CT images from other institutions.** FELIX 1.2 was trained on Cohort 1 and 2, with modifications described in Materials & Methods, and tested on Cohort 4. As before, we record a correct detection only if we also correctly localize the PDAC. This produced a sensitivity of 95.0% before radiologist re-review and 97.0% after radiologist re-review (Fig-

671

672

673

674

675

676

677

678

679

680

681

682

683

684

685

686

687

ure 4c). We achieve DSC scores of 82.8% for the pancreas and 58.4% for PDACs. It was impossible to measure the specificity since all the CTs in Cohort 4 contained PDACs. To do an alternative check of specificity we used Cohort 3 of 82 scans as a surrogate for normal cases. This gave specificity results of 92.7% both before and after radiologist re-review, which is lower than observed with Cohorts 1 and 2 but still acceptable.

Furthermore, we applied FELIX 1.2 to the Heidelberg dataset using the same training as for Cohort 4. This dataset was also annotated with the pancreas and PDACs. This dataset contained new challenges because, for example, the positioning of the patients in some of the scans differed from those in the Hopkins dataset by 30 degrees or more (this is a protocol used at Heidelberg to make it easier to detect tumors). For venous only, we obtained a sensitivity of 91.3% and specificity of 94.8%; for arterial only, we obtained a sensitivity of 95.7% and specificity of 91.4%. For dual-phase, we get 90.9% sensitivity and 91.6% specificity (Figure 4d). We achieved DSC scores of 82.2% for the pancreas and 54.3% for PDAC segmentation. These results were without checking for localization.
